# Supplementary material for: Kinetic Characterization of Novel HIV-1 Entry Inhibitors: Discovery of a Relationship between Off-Rate and Potency
Source: Molecules. 2018 Aug 3;23(8):1940. doi: 10.3390/molecules23081940 (PMC6222832; doi:10.3390/molecules23081940)

## SPR interaction analysis: BMS-626529

Binding assays using BMS-626529 were performed on a ProteOn XPR36 SPR Protein Interaction Array System (Bio-Rad Laboratories, Hercules, CA). The instrument temperature was set at 25°C for all kinetic analyses. ProteOn GLH sensor chips were preconditioned with two short pulses each (10 seconds) of 50 mM NaOH, 100 mM HCl, and 0.5% sodium dodecyl sulfide. Then the system was equilibrated with PBS-T buffer (20 mM sodium phosphate, 150 mM NaCl, and 0.005% polysorbate 20, pH 7.4). The surface of a GLH sensorchip was activated with a 1:100 dilution of a 1:1 mixture of 1-ethyl-3-(3-dimethylaminopropyl) carbodiimide hydrochloride (0.2 M) and sulfo-*N*-hydroxysuccinimide (0.05 M). Immediately after chip activation, the HIV-1 B41 SOSIP.664 gp140 trimer, purified as outlined in Pugach et al.,<sup>1</sup> was prepared at a concentration of 100 µg/ml in 10 mM sodium acetate, pH 5.0 and injected across ligand flow channels for 15 min at a flow rate of 30 µl/min. Then, after unreacted protein had been washed out, excess active ester groups on the sensor surface were capped by a 5 minutes injection of 1 M ethanolamine HCl (pH 8.0) at a flow rate of 5 µl/min. This resulted in a ligand density of 13,600 RU (Theoretical  $R_{\max}$  = ~40 RU). A reference surface was similarly created by immobilizing a non-specific protein (IgG b12 anti HIV-1 gp120; was obtained through the NIH AIDS Reagent Program, Division of AIDS, NIAID, NIH: Anti-HIV-1 gp120 Monoclonal (IgG1 b12) from Dr. Dennis Burton and Carlos Barbas) and was used as a background to correct non-specific binding.

To prepare BMS-626529 for direct binding analysis, compound stock solutions, along with 100% DMSO, and totaling 30 µl was made to a final volume of 1 ml by addition of sample preparation buffer (PBS, pH 7.4). Preparation of analyte in this manner ensured that the concentration of DMSO was matched with that of running buffer with 3% DMSO. Serial dilutions were then prepared in the running buffer (PBS, 3% DMSO, 0.005% polysorbate 20, pH 7.4) and injected at a flow rate of 100 µl/min, for a 1 minute association phase, followed by up to a 10 minutes dissociation phase using the “one shot kinetics” capability of the Proteon instrument.<sup>2</sup> Data were analyzed using the ProteOn Manager Software version 3.0 (Bio-Rad). The responses of a buffer injection and responses from the reference flow cell were subtracted to account for the nonspecific binding and injection artifacts. The kinetic rate parameters, derived from a minimum of four experiments, were calculated in ProteOn Manager Version 3.1.0.6 (Bio-Rad, Hercules, CA), by fitting to a simple Langmuir 1:1 binding model. The average of the on- and off-rates were used to determine the equilibrium dissociation constant,  $K_D$ .

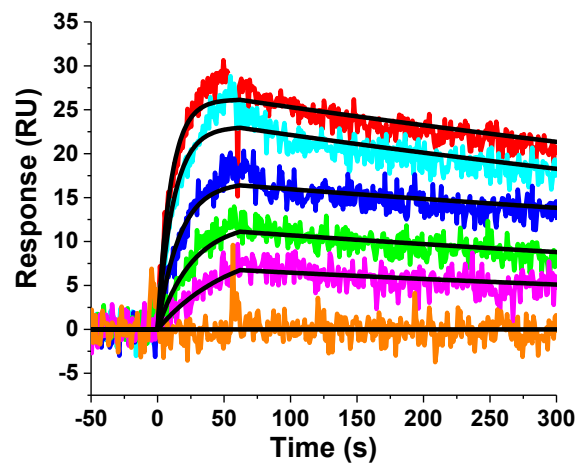

**Supplemental Figure 1. Representative sensorgrams depicting the BMS-626529 interaction with soluble, cleaved Env trimer.** Coloured lines depict actual data, whereas black lines show fitting to a simple 1:1 binding model. BMS-626529 was injected over the Env surfaces at 5, 2.5, 1.25, 0.625, 0.3125, and 0  $\mu$ M concentrations.

1. Pugach, P.; Ozorowski, G.; Cupo, A.; Ringe, R.; Yasmeen, A.; de Val, N.; Derking, R.; Kim, H. J.; Korzun, J.; Golabek, M.; de Los Reyes, K.; Ketas, T. J.; Julien, J. P.; Burton, D. R.; Wilson, I. A.; Sanders, R. W.; Klasse, P. J.; Ward, A. B.; Moore, J. P., A Native-Like SOSIP.664 Trimer Based on an HIV-1 Subtype B env Gene. *J Virol* **2015**, 89 (6), 3380-95.
2. Bravman, T., et al., *Exploring "one-shot" kinetics and small molecule analysis using the ProteOn XPR36 array biosensor*. Anal Biochem, 2006. **358**(2): p. 281-8.

# QC data for compounds

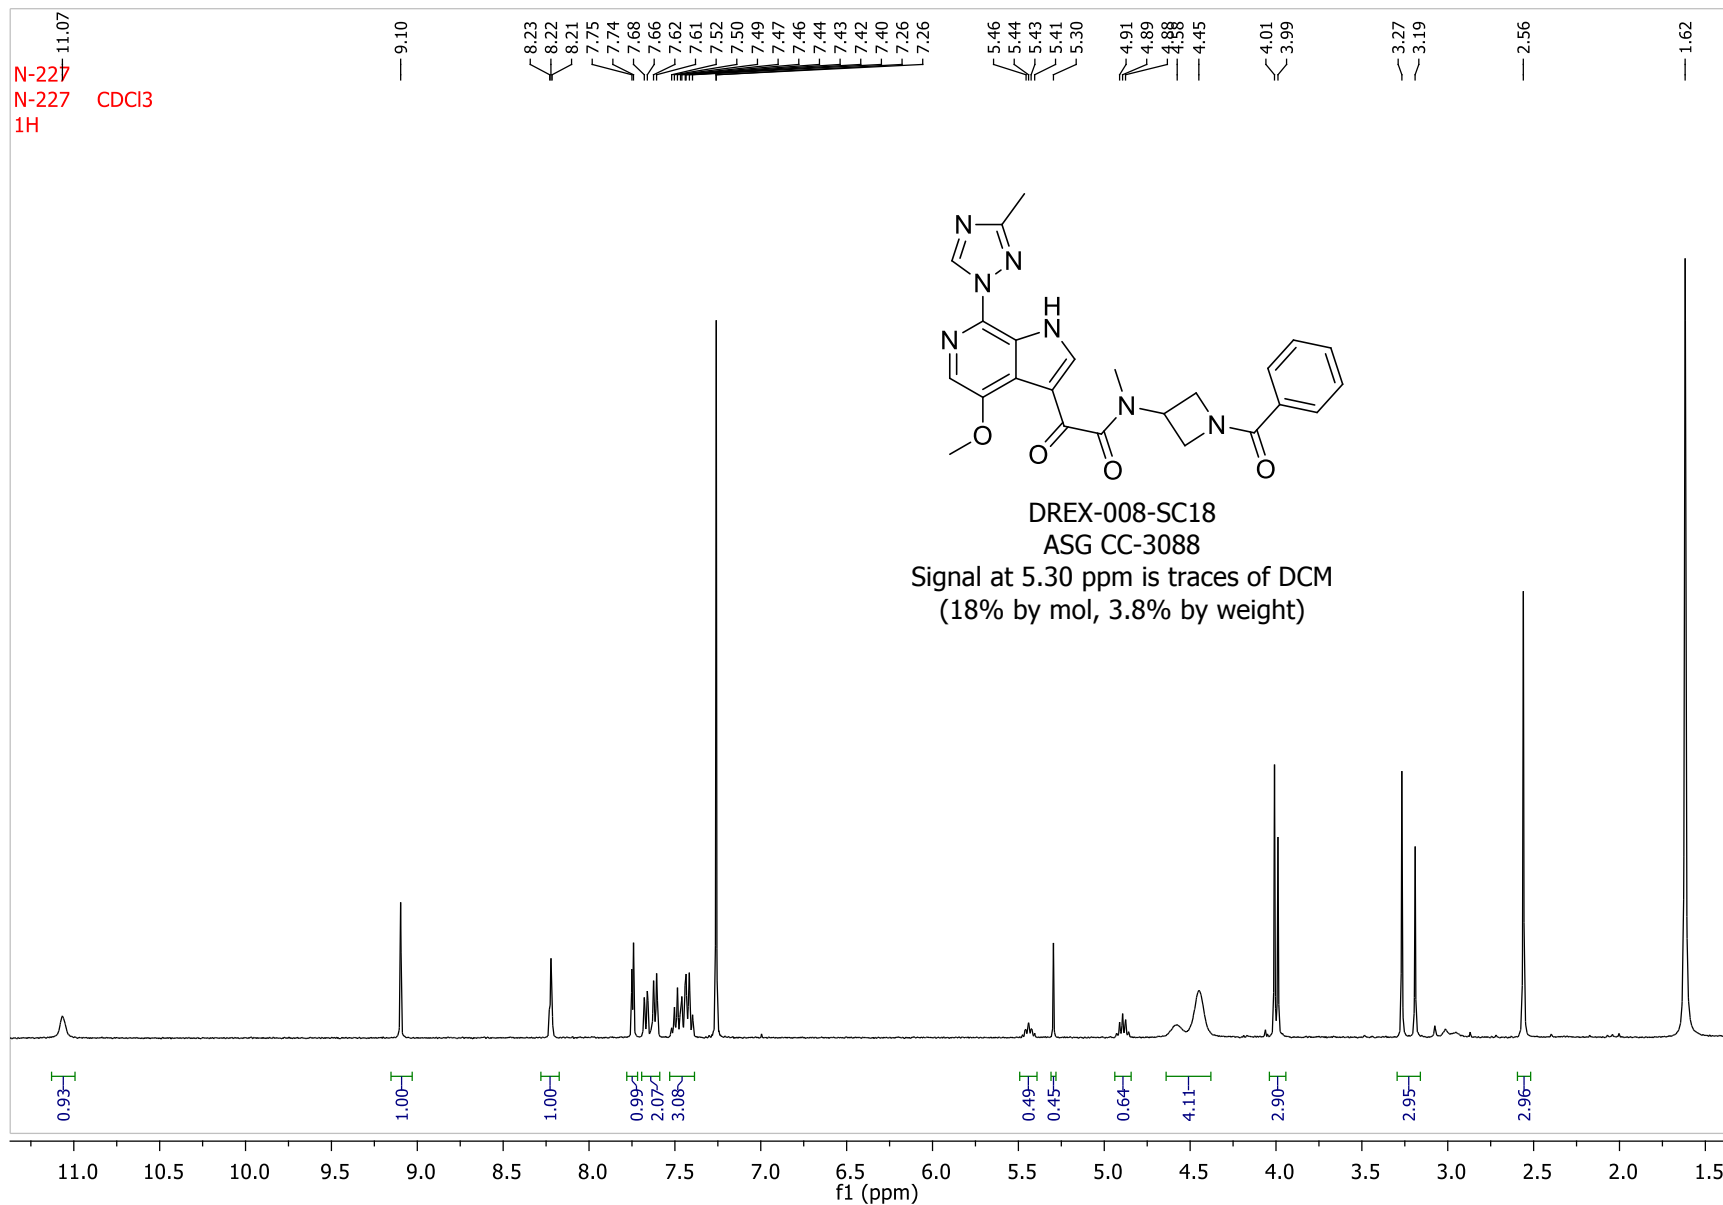

LCMS. SC18

PharmaVam

NCptt\_DREX-008-SC18\_76

2: Diode Array  
254  
Range: 3.26  
Area

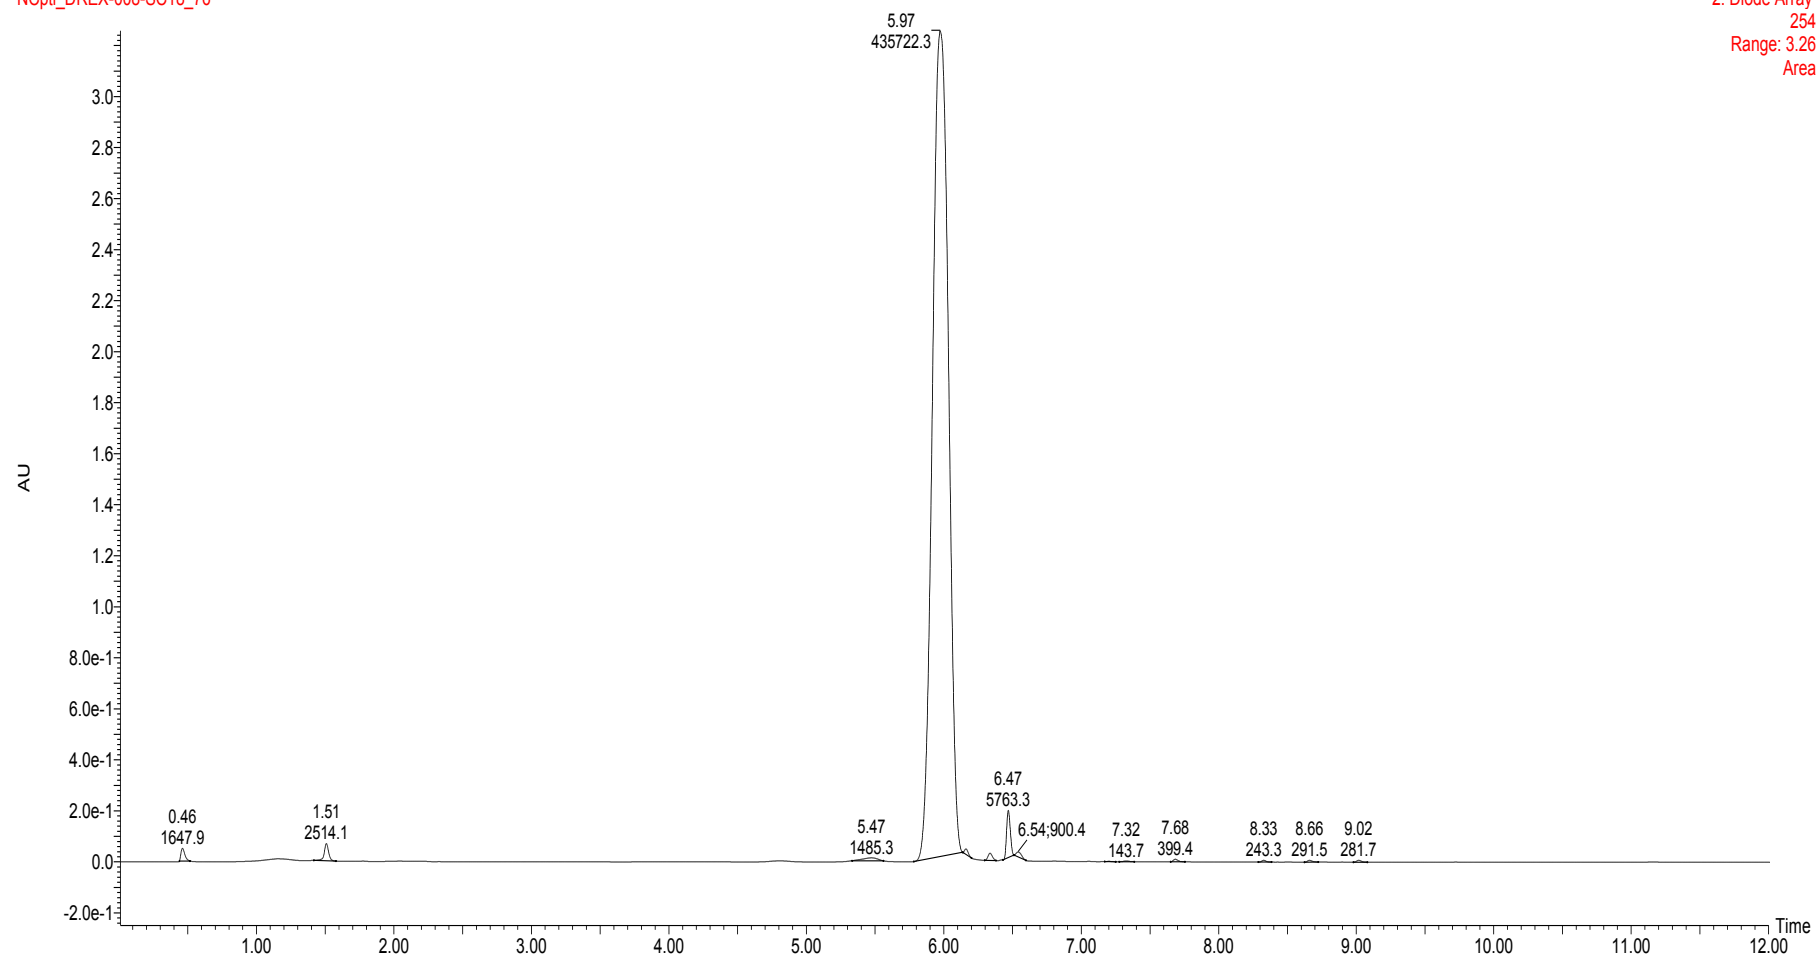

LCMS. SC18.

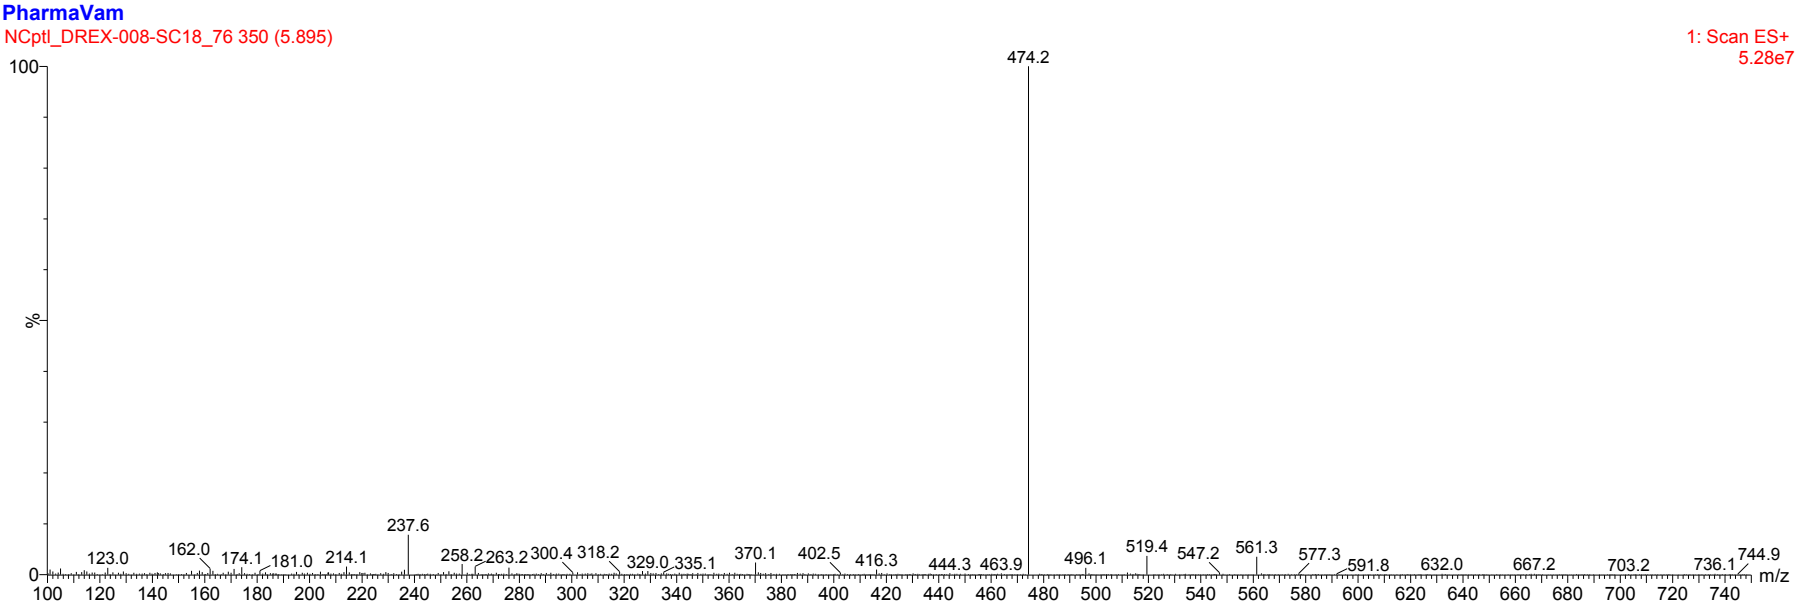

SC39

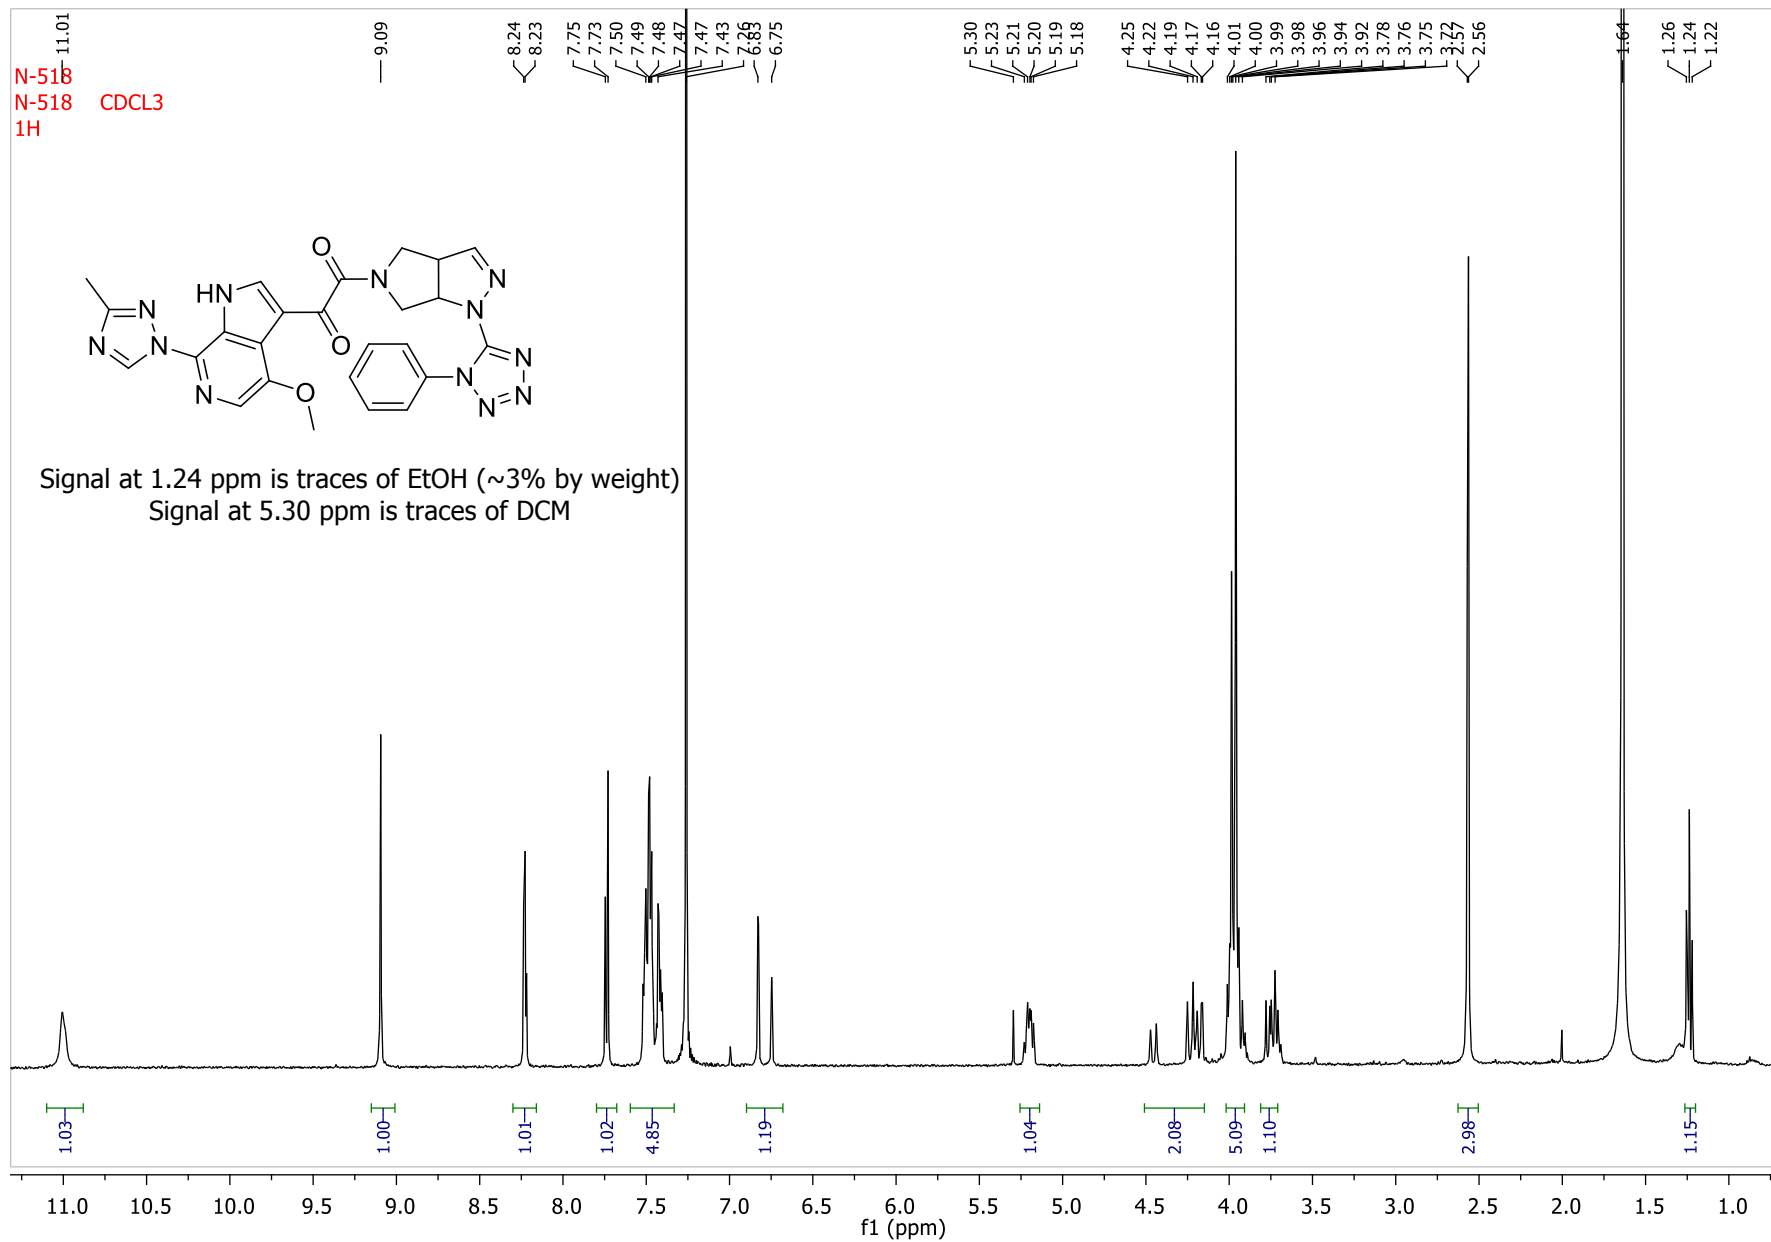

# SC11

## LCMS Analysis Report

Compound ID: SC-11(HDBA0527-18-1)

Pump A : 0.1% formic acid in 100% water

Pump B : 0.1% formic acid in 100% acetonitrile

Total Flow : 0.3ml/min

Volume : 0.2ul

wave-length : 190-500nm

| Gradient: | Time | A   | B    |
|-----------|------|-----|------|
|           | 0.01 | 80% | 20%  |
|           | 2.50 | 0%  | 100% |
|           | 2.60 | 80% | 20%  |

Column: Waters BEH C18 2.1x50mm 1.7um

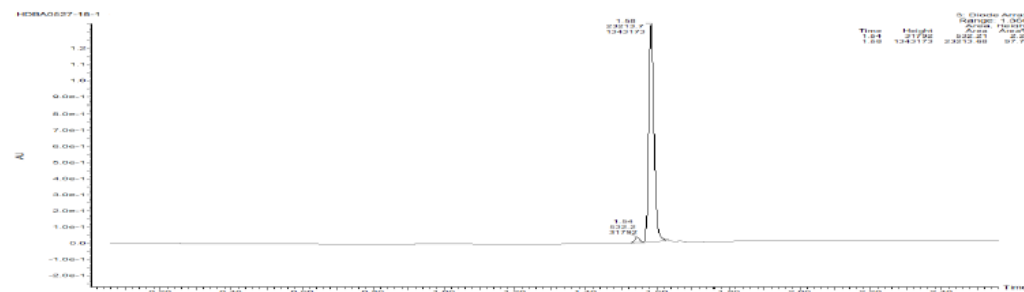

| Peak number | Retention time(min) | Height(Au) | Area(Au*s) | Area% |
|-------------|---------------------|------------|------------|-------|
| 1           | 1.54                | 31792      | 532.21     | 2.24  |
| 2           | 1.58                | 1343173    | 23213.68   | 97.76 |

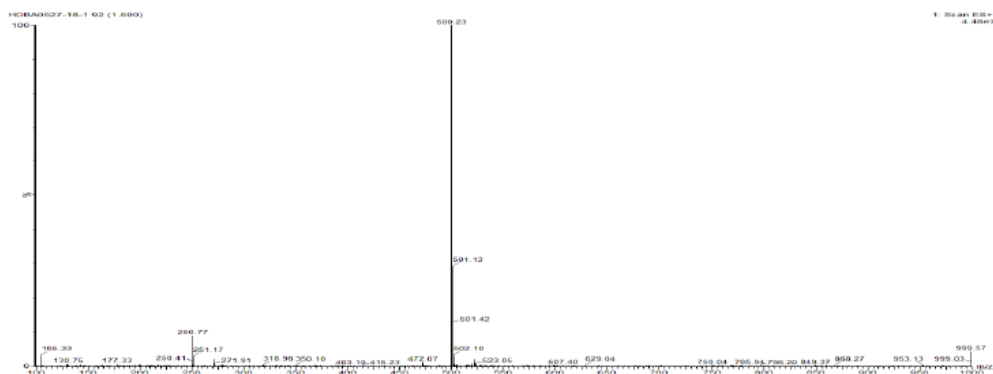

# SC16

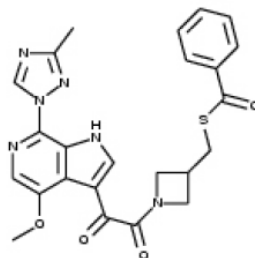

QP-130718-SC16\_001 MW:490.5

=====  
Injection Date : Fri, 27. Sep. 2013  
Acq Operator : 005654  
Location : P1-A-07  
Inj. Vol. : 2ul  
Acq Method : E:\DATA\130927-WG2\WUXIAB01.M  
Data Filename : E:\DATA\130927-WG2\WG2IR1AG1.D  
LCMS-W

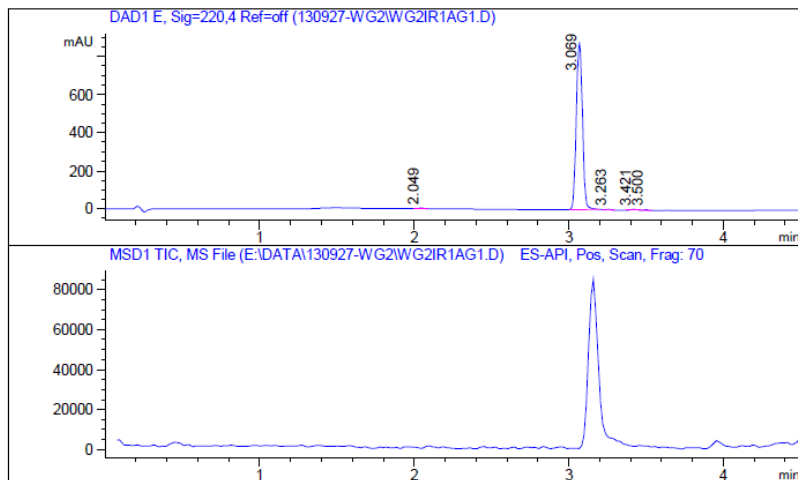

## Report

=====  
Signal 1 : DAD1 E, Sig=220,4 Ref=off

| Peak # | RT [min] | Area     | Height  | Height % | Width [min] | Area % |
|--------|----------|----------|---------|----------|-------------|--------|
| 1      | 2.049    | 10.270   | 3.554   | 0.397    | 0.048       | 0.411  |
| 2      | 3.069    | 2456.402 | 881.848 | 98.407   | 0.046       | 98.321 |
| 3      | 3.263    | 7.080    | 2.563   | 0.286    | 0.046       | 0.283  |
| 4      | 3.421    | 16.383   | 5.132   | 0.573    | 0.053       | 0.656  |
| 5      | 3.500    | 8.220    | 3.022   | 0.337    | 0.045       | 0.329  |

=====

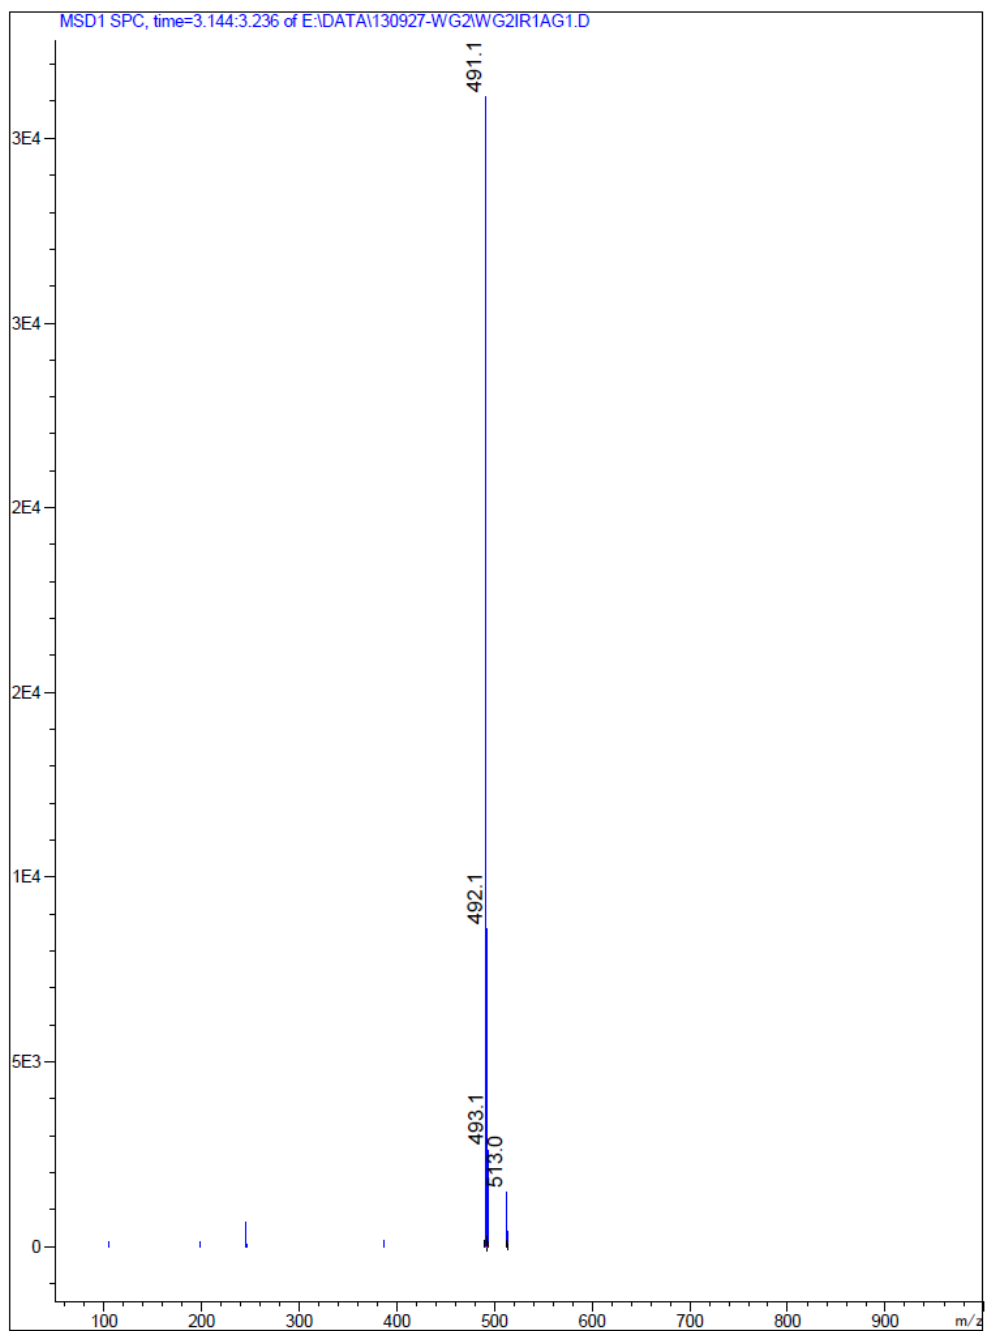

Supplement: Supplementary file 1 [file molecules-23-01940-s001.pdf]
